# Supplementary material
Source: PubMed Central journal article supplement (PMC5580900)
Supplement: 10.1194_M077925_jlr.M077925-1.pdf [file 10.1194_M077925_jlr.M077925-1.pdf]

## Pleiotropic Effects of Apolipoprotein C3 on HDL functionality and Adipose Tissue

### Metabolic Activity

Evangelia Zvintzou<sup>1</sup>, Marie Lhomme<sup>2</sup>, Stella Chasapi<sup>3</sup>, Serafoula Filou<sup>1</sup>, Vassilis Theodoropoulos<sup>1</sup>, Eva Xapapadaki<sup>1</sup>, Anatol Kontush<sup>4</sup>, George Spyroulias<sup>3</sup>, Constantinos C. Tellis<sup>5</sup>, Alexandros D. Tselepis<sup>5</sup>, Caterina Constantinou<sup>1</sup> and Kyriakos E. Kypreos<sup>1,\*</sup>

<sup>1</sup>Pharmacology Department, University of Patras Medical School, Rio Achaias, TK 26500, Greece; <sup>2</sup>ICANalytics, ICAN, 83 Bd de l'hopital, 75013 Paris; <sup>3</sup>Department of Pharmacy, University of Patras, 26504, Patras, Greece; <sup>4</sup>INSERM UMR\_S 1166 – ICAN, Faculté de Médecine Pitié-Salpêtrière, 91 Bd de l'Hôpital, 75013 Paris, France; <sup>5</sup>Laboratory of Biochemistry, Department of Chemistry, University of Ioannina, 45110 Ioannina, Greece.

### SUPPLEMENTAL TABLE S1

TABLE S1. Primers used in the real -time PCR analysis.

| Primer Name | Sequence (5'-3')        |
|-------------|-------------------------|
| mapoa-I_F   | GGAGCTGCAAGGGAGACTGT    |
| mapoa-I_R   | TGCGCAGAGAGTCTACGTGTGT  |
| mapoe_F     | CTGACAGGATGCCTAGCCG     |
| mapoe_R     | CGCAGGTAATCCCAGAAGC     |
| mapoa2_F    | GCAGACGGACCGGATATGC     |
| mapoa2_R    | GCTGCTCGTGTGTCTTCTCA    |
| mapoc1_F    | TCCTGTCCTGATTGTGGTCGT   |
| mapoc1_R    | CCAAAGTGTTCCCAAACCTCCTT |
