# Supplementary material
Source: PubMed Central journal article supplement (PMC5580900)
Supplement: 10.1194_M077925_jlr.M077925-2.pdf [file 10.1194_M077925_jlr.M077925-2.pdf]

## Pleiotropic Effects of Apolipoprotein C3 on HDL functionality and Adipose Tissue

### Metabolic Activity

Evangelia Zvintzou<sup>1</sup>, Marie Lhomme<sup>2</sup>, Stella Chasapi<sup>3</sup>, Serafoula Filou<sup>1</sup>, Vassilis Theodoropoulos<sup>1</sup>, Eva Xapapadaki<sup>1</sup>, Anatol Kontush<sup>4</sup>, George Spyroulias<sup>3</sup>, Constantinos C. Tellis<sup>5</sup>, Alexandros D. Tselepis<sup>5</sup>, Caterina Constantinou<sup>1</sup> and Kyriakos E. Kypreos<sup>1,\*</sup>

<sup>1</sup>Pharmacology Department, University of Patras Medical School, Rio Achaias, TK 26500, Greece; <sup>2</sup>ICANalytics, ICAN, 83 Bd de l'hopital, 75013 Paris; <sup>3</sup>Department of Pharmacy, University of Patras, 26504, Patras, Greece; <sup>4</sup>NSERM UMR\_S 1166 – ICAN, Faculté de Médecine Pitié-Salpêtrière, 91 Bd de l'Hôpital, 75013 Paris, France; <sup>5</sup>Laboratory of Biochemistry, Department of Chemistry, University of Ioannina, 45110 Ioannina, Greece.

### SUPPLEMENTAL TABLE S2

TABLE S2. Lipid classes in HDL expressed as mol% of total lipids

|          | APOC3-HDL_1 | APOC3-HDL_2 | APOC3-HDL_3 | control-HDL_1 | control-HDL_2 | control-HDL_3 |
|----------|-------------|-------------|-------------|---------------|---------------|---------------|
| LPC mol% | 8,84        | 8,45        | 7,42        | 5,59          | 5,27          | 5,72          |
| LPE mol% | 0,34        | 0,45        | 0,41        | 0,20          | 0,16          | 0,17          |
| PA mol%  | 0,16        | 0,17        | 0,18        | 0,24          | 0,23          | 0,24          |
| PS mol%  | 0,06        | 0,06        | 0,06        | 0,01          | 0,01          | 0,02          |
| PG mol%  | 0,01        | 0,01        | 0,01        | 0,01          | 0,01          | 0,01          |
| PI mol%  | 2,53        | 2,90        | 2,82        | 4,25          | 4,21          | 4,77          |
| PE mol%  | 1,41        | 1,30        | 1,36        | 0,77          | 0,74          | 0,73          |
| PC mol%  | 80,29       | 80,98       | 81,44       | 83,49         | 84,23         | 82,70         |
| SM mol%  | 6,26        | 5,60        | 6,21        | 5,37          | 5,07          | 5,57          |
| Cer mol% | 0,10        | 0,10        | 0,09        | 0,07          | 0,07          | 0,08          |

PC, Phosphatidylcholine; LPC, Lysophosphatidylcholine; SM, Sphingomyelin; PI, Phosphatidylinositol; PE, Phosphatidylethanolamine; LPE, Lysophosphatidylethanolamine; PA, Phosphatidic acid; PS, Phosphatidylserine; PG, Phosphatidylglycerol; Cer, Ceramide
