# Supplementary material
Source: PubMed Central journal article supplement (PMC5580900)
Supplement: 10.1194_M077925_jlr.M077925-3.pdf [file 10.1194_M077925_jlr.M077925-3.pdf]

## **Pleiotropic Effects of Apolipoprotein C3 on HDL functionality and Adipose Tissue**

### **Metabolic Activity**

Evangelia Zvintzou<sup>1</sup>, Marie Lhomme<sup>2</sup>, Stella Chasapi<sup>3</sup>, Serafoula Filou<sup>1</sup>, Vassilis Theodoropoulos<sup>1</sup>, Eva Xapapadaki<sup>1</sup>, Anatol Kontush<sup>4</sup>, George Spyroulias<sup>3</sup>, Constantinos C. Tellis<sup>5</sup>, Alexandros D. Tselepis<sup>5</sup>, Caterina Constantinou<sup>1</sup> and Kyriakos E. Kypreos<sup>1,\*</sup>

<sup>1</sup>Pharmacology Department, University of Patras Medical School, Rio Achaias, TK 26500, Greece; <sup>2</sup>ICANalytics, ICAN, 83 Bd de l'hôpital, 75013 Paris; <sup>3</sup>Department of Pharmacy, University of Patras, 26504, Patras, Greece; <sup>4</sup>INSERM UMR\_S 1166 – ICAN, Faculté de Médecine Pitié-Salpêtrière, 91 Bd de l'Hôpital, 75013 Paris, France; <sup>5</sup>Laboratory of Biochemistry, Department of Chemistry, University of Ioannina, 45110 Ioannina, Greece.

### **SUPPLEMENTAL TABLE S3**

TABLE S3. Lipid species in HDL expressed as mol% of total lipids.

|                  | APOC3-HDL 1 | APOC3-HDL 2 | APOC3-HDL 3 | control-HDL 1 | control-HDL 2 | control-HDL 3 |
|------------------|-------------|-------------|-------------|---------------|---------------|---------------|
| Volume extracted | 150         | 150         | 150         | 150           | 150           | 150           |
| LPC(16:0) mol%   | 4,367       | 3,984       | 3,494       | 2,800         | 2,542         | 2,845         |
| LPC(18:0) mol%   | 3,060       | 2,517       | 2,255       | 1,544         | 1,563         | 1,695         |
| LPC(18:1) mol%   | 0,652       | 0,722       | 0,610       | 0,474         | 0,449         | 0,452         |
| LPC(18:2) mol%   | 0,528       | 0,814       | 0,729       | 0,487         | 0,443         | 0,462         |
| LPC(18:3) mol%   | 0,011       | 0,015       | 0,012       | 0,012         | 0,009         | 0,010         |
| LPC(20:0) mol%   | 0,009       | 0,007       | 0,008       | 0,018         | 0,016         | 0,015         |
| LPC(20:1) mol%   | 0,013       | 0,010       | 0,009       | 0,012         | 0,012         | 0,011         |
| LPC(20:2) mol%   | 0,012       | 0,012       | 0,010       | 0,008         | 0,006         | 0,009         |
| LPC(20:3) mol%   | 0,029       | 0,042       | 0,035       | 0,035         | 0,035         | 0,034         |
| LPC(20:4) mol%   | 0,062       | 0,155       | 0,117       | 0,073         | 0,064         | 0,067         |
| LPC(20:5) mol%   | 0,007       | 0,022       | 0,018       | 0,012         | 0,009         | 0,010         |
| LPC(22:4) mol%   | 0,002       | 0,003       | 0,003       | 0,001         | 0,001         | 0,001         |
| LPC(22:5) mol%   | 0,008       | 0,010       | 0,008       | 0,010         | 0,009         | 0,009         |
| LPC(22:6) mol%   | 0,082       | 0,134       | 0,115       | 0,107         | 0,109         | 0,100         |
| LPE(16:0) mol%   | 0,060       | 0,056       | 0,058       | 0,029         | 0,029         | 0,032         |
| LPE(16:1) mol%   | 0,001       | 0,002       | 0,002       | 0,001         | 0,001         | 0,001         |
| LPE(18:0) mol%   | 0,145       | 0,126       | 0,127       | 0,043         | 0,046         | 0,048         |
| LPE(18:1) mol%   | 0,042       | 0,052       | 0,048       | 0,023         | 0,019         | 0,019         |
| LPE(18:2) mol%   | 0,035       | 0,060       | 0,052       | 0,028         | 0,023         | 0,023         |
| LPE(18:3) mol%   | 0,002       | 0,003       | 0,002       | 0,015         | 0,003         | 0,003         |
| LPE(20:3) mol%   | 0,003       | 0,005       | 0,004       | 0,003         | 0,003         | 0,003         |
| LPE(20:4) mol%   | 0,016       | 0,046       | 0,038       | 0,017         | 0,011         | 0,014         |

|                |       |       |       |       |       |       |
|----------------|-------|-------|-------|-------|-------|-------|
| LPE(20:5) mol% | 0,004 | 0,010 | 0,008 | 0,005 | 0,003 | 0,003 |
| LPE(22:5) mol% | 0,002 | 0,008 | 0,007 | 0,004 | 0,003 | 0,004 |
| LPE(22:6) mol% | 0,034 | 0,078 | 0,060 | 0,031 | 0,019 | 0,020 |
| PA(32:1) mol%  | 0,001 | 0,001 | 0,001 | 0,001 | 0,001 | 0,001 |
| PA(34:1) mol%  | 0,004 | 0,005 | 0,006 | 0,005 | 0,004 | 0,004 |
| PA(34:2) mol%  | 0,037 | 0,041 | 0,039 | 0,041 | 0,040 | 0,042 |
| PA(34:3) mol%  | 0,002 | 0,003 | 0,003 | 0,003 | 0,003 | 0,003 |
| PA(36:1) mol%  | 0,001 | 0,001 | 0,001 | 0,001 | 0,001 | 0,001 |
| PA(36:2) mol%  | 0,030 | 0,030 | 0,031 | 0,032 | 0,030 | 0,030 |
| PA(36:3) mol%  | 0,011 | 0,012 | 0,014 | 0,015 | 0,016 | 0,016 |
| PA(36:4) mol%  | 0,010 | 0,011 | 0,010 | 0,022 | 0,021 | 0,022 |
| PA(38:3) mol%  | 0,007 | 0,007 | 0,008 | 0,014 | 0,015 | 0,014 |
| PA(38:4) mol%  | 0,049 | 0,048 | 0,050 | 0,087 | 0,079 | 0,083 |
| PA(38:5) mol%  | 0,005 | 0,005 | 0,005 | 0,011 | 0,008 | 0,011 |
| PA(38:6) mol%  | 0,002 | 0,003 | 0,003 | 0,004 | 0,004 | 0,004 |
| PA(40:4) mol%  | 0,001 | 0,001 | 0,001 | 0,001 | 0,001 | 0,001 |
| PA(40:5) mol%  | 0,001 | 0,001 | 0,001 | 0,002 | 0,002 | 0,002 |
| PA(40:6) mol%  | 0,003 | 0,003 | 0,003 | 0,003 | 0,003 | 0,004 |
| PA(40:7) mol%  | 0,001 | 0,001 | 0,001 | 0,001 | 0,001 | 0,001 |
| PS(34:1) mol%  | 0,003 | 0,004 | 0,004 | 0,001 | 0,001 | 0,001 |
| PS(36:1) mol%  | 0,014 | 0,012 | 0,012 | 0,002 | 0,002 | 0,002 |
| PS(36:2) mol%  | 0,009 | 0,008 | 0,009 | 0,002 | 0,002 | 0,002 |
| PS(36:4) mol%  | 0,002 | 0,001 | 0,001 | 0,001 | 0,001 | 0,001 |
| PS(38:3) mol%  | 0,002 | 0,002 | 0,002 | 0,000 | 0,000 | 0,000 |
| PS(38:4) mol%  | 0,009 | 0,008 | 0,008 | 0,003 | 0,002 | 0,003 |

|               |       |       |       |       |       |       |
|---------------|-------|-------|-------|-------|-------|-------|
| PS(38:5) mol% | 0,001 | 0,002 | 0,002 | 0,001 | 0,001 | 0,001 |
| PS(40:4) mol% | 0,000 | 0,001 | 0,001 | 0,000 | 0,000 | 0,000 |
| PS(40:5) mol% | 0,003 | 0,003 | 0,002 | 0,001 | 0,001 | 0,000 |
| PS(40:6) mol% | 0,013 | 0,014 | 0,012 | 0,003 | 0,003 | 0,002 |
| PS(40:7) mol% | 0,002 | 0,002 | 0,002 | 0,001 | 0,001 | 0,001 |
| PS(40:8) mol% | 0,001 | 0,001 | 0,002 | 0,001 | 0,001 | 0,001 |
| PG(34:1) mol% | 0,003 | 0,002 | 0,003 | 0,003 | 0,003 | 0,004 |
| PG(36:1) mol% | 0,001 | 0,001 | 0,001 | 0,001 | 0,001 | 0,002 |
| PG(36:2) mol% | 0,002 | 0,003 | 0,003 | 0,004 | 0,003 | 0,004 |
| PE(28:0) mol% | 0,002 | 0,002 | 0,002 | 0,001 | 0,001 | 0,001 |
| PE(30:1) mol% | 0,000 | 0,000 | 0,000 | 0,000 | 0,000 | 0,000 |
| PE(32:0) mol% | 0,003 | 0,003 | 0,003 | 0,002 | 0,002 | 0,003 |
| PE(32:1) mol% | 0,005 | 0,006 | 0,004 | 0,003 | 0,002 | 0,003 |
| PE(34:0) mol% | 0,004 | 0,004 | 0,003 | 0,003 | 0,003 | 0,003 |
| PE(34:1) mol% | 0,086 | 0,080 | 0,088 | 0,026 | 0,024 | 0,027 |
| PE(34:2) mol% | 0,202 | 0,201 | 0,198 | 0,070 | 0,065 | 0,064 |
| PE(36:1) mol% | 0,031 | 0,027 | 0,023 | 0,014 | 0,013 | 0,014 |
| PE(36:2) mol% | 0,258 | 0,240 | 0,252 | 0,093 | 0,084 | 0,086 |
| PE(36:3) mol% | 0,053 | 0,050 | 0,049 | 0,025 | 0,022 | 0,024 |
| PE(36:4) mol% | 0,084 | 0,081 | 0,077 | 0,049 | 0,049 | 0,044 |
| PE(36:5) mol% | 0,028 | 0,025 | 0,029 | 0,026 | 0,032 | 0,026 |
| PE(38:2) mol% | 0,019 | 0,017 | 0,021 | 0,020 | 0,019 | 0,017 |
| PE(38:3) mol% | 0,035 | 0,031 | 0,039 | 0,025 | 0,018 | 0,024 |
| PE(38:4) mol% | 0,137 | 0,136 | 0,118 | 0,068 | 0,069 | 0,065 |
| PE(38:5) mol% | 0,061 | 0,056 | 0,067 | 0,065 | 0,069 | 0,060 |

|               |       |       |       |       |       |       |
|---------------|-------|-------|-------|-------|-------|-------|
| PE(38:6) mol% | 0,213 | 0,181 | 0,217 | 0,150 | 0,150 | 0,149 |
| PE(40:4) mol% | 0,005 | 0,004 | 0,004 | 0,003 | 0,005 | 0,004 |
| PE(40:5) mol% | 0,012 | 0,009 | 0,010 | 0,012 | 0,012 | 0,013 |
| PE(40:6) mol% | 0,115 | 0,106 | 0,111 | 0,065 | 0,056 | 0,059 |
| PE(40:7) mol% | 0,042 | 0,033 | 0,038 | 0,032 | 0,032 | 0,030 |
| PE(40:8) mol% | 0,009 | 0,009 | 0,010 | 0,017 | 0,012 | 0,013 |
| PI(32:1) mol% | 0,004 | 0,003 | 0,005 | 0,006 | 0,009 | 0,008 |
| PI(34:1) mol% | 0,021 | 0,023 | 0,023 | 0,031 | 0,040 | 0,033 |
| PI(34:2) mol% | 0,140 | 0,179 | 0,176 | 0,304 | 0,256 | 0,353 |
| PI(36:1) mol% | 0,017 | 0,013 | 0,015 | 0,016 | 0,024 | 0,025 |
| PI(36:2) mol% | 0,277 | 0,315 | 0,356 | 0,366 | 0,429 | 0,415 |
| PI(36:3) mol% | 0,115 | 0,131 | 0,135 | 0,183 | 0,179 | 0,202 |
| PI(36:4) mol% | 0,177 | 0,196 | 0,156 | 0,394 | 0,384 | 0,449 |
| PI(38:3) mol% | 0,146 | 0,227 | 0,222 | 0,281 | 0,282 | 0,371 |
| PI(38:4) mol% | 1,401 | 1,577 | 1,504 | 2,267 | 2,212 | 2,510 |
| PI(38:5) mol% | 0,107 | 0,095 | 0,093 | 0,189 | 0,187 | 0,190 |
| PI(38:6) mol% | 0,034 | 0,028 | 0,025 | 0,048 | 0,047 | 0,045 |
| PI(40:4) mol% | 0,007 | 0,015 | 0,015 | 0,034 | 0,032 | 0,014 |
| PI(40:5) mol% | 0,025 | 0,025 | 0,029 | 0,046 | 0,054 | 0,068 |
| PI(40:6) mol% | 0,064 | 0,067 | 0,063 | 0,081 | 0,080 | 0,085 |
| PC(28:0) mol% | 0,055 | 0,053 | 0,050 | 0,061 | 0,065 | 0,073 |
| PC(30:0) mol% | 0,097 | 0,086 | 0,074 | 0,033 | 0,038 | 0,040 |
| PC(30:1) mol% | 0,015 | 0,013 | 0,014 | 0,008 | 0,009 | 0,010 |
| PC(32:0) mol% | 1,057 | 1,044 | 0,972 | 0,735 | 0,691 | 0,769 |
| PC(32:1) mol% | 1,043 | 1,055 | 1,065 | 0,728 | 0,768 | 0,818 |

|                         |        |        |        |        |        |        |
|-------------------------|--------|--------|--------|--------|--------|--------|
| PC(34:0) mol%           | 0,699  | 0,617  | 0,534  | 0,535  | 0,513  | 0,602  |
| PC(34:1) mol%           | 10,522 | 10,694 | 10,621 | 10,314 | 10,792 | 10,826 |
| PC(34:2) mol%           | 22,052 | 23,226 | 23,249 | 21,869 | 22,885 | 22,230 |
| PC(34:3) mol%           | 1,714  | 1,490  | 1,566  | 1,465  | 1,456  | 1,583  |
| PC(36:0) mol%           | 0,033  | 0,041  | 0,054  | 0,033  | 0,033  | 0,064  |
| PC(36:1) mol%           | 2,217  | 2,242  | 1,965  | 1,877  | 1,979  | 2,146  |
| PC(36:2) mol%           | 12,692 | 12,507 | 12,674 | 11,534 | 11,596 | 10,603 |
| PC(36:3) mol%           | 5,350  | 5,219  | 5,332  | 4,935  | 4,811  | 4,995  |
| PC(36:4) mol%           | 5,724  | 6,505  | 6,663  | 6,613  | 6,226  | 6,553  |
| PC(36:5) mol%           | 1,334  | 1,358  | 1,442  | 1,736  | 1,729  | 1,540  |
| PC(36:6) mol%           | 0,067  | 0,067  | 0,047  | 0,066  | 0,082  | 0,066  |
| PC(38:2) mol%           | 0,239  | 0,218  | 0,216  | 0,423  | 0,494  | 0,437  |
| PC(38:3) mol%           | 1,030  | 0,978  | 0,971  | 1,498  | 1,326  | 1,233  |
| PC(38:4) mol%           | 3,403  | 3,094  | 3,293  | 3,030  | 3,347  | 3,085  |
| PC(38:5) mol%           | 1,656  | 1,544  | 1,852  | 2,667  | 2,197  | 2,420  |
| PC(38:6) mol%           | 6,387  | 6,232  | 6,138  | 9,795  | 9,495  | 9,151  |
| PC(40:4) mol%           | 0,106  | 0,091  | 0,090  | 0,183  | 0,175  | 0,172  |
| PC(40:5) mol%           | 0,169  | 0,176  | 0,215  | 0,376  | 0,340  | 0,362  |
| PC(40:6) mol%           | 2,442  | 2,251  | 2,142  | 2,833  | 2,928  | 2,684  |
| PC(40:8) mol%           | 0,184  | 0,176  | 0,206  | 0,142  | 0,253  | 0,231  |
| Cer(d18:0-16:0)<br>mol% | 0,002  | 0,002  | 0,002  | 0,001  | 0,000  | 0,001  |
| Cer(d18:0-18:0)<br>mol% | 0,001  | 0,000  | 0,001  | 0,000  | 0,000  | 0,000  |

|                         |       |       |       |       |       |       |
|-------------------------|-------|-------|-------|-------|-------|-------|
| Cer(d18:0-20:0)<br>mol% | 0,000 | 0,000 | 0,000 | 0,000 | 0,000 | 0,000 |
| Cer(d18:0-22:0)<br>mol% | 0,002 | 0,001 | 0,001 | 0,001 | 0,001 | 0,001 |
| Cer(d18:0-24:1)<br>mol% | 0,002 | 0,002 | 0,002 | 0,001 | 0,000 | 0,001 |
| Cer(d18:1-14:0)<br>mol% | 0,000 | 0,000 | 0,000 | 0,000 | 0,000 | 0,000 |
| Cer(d18:1-16:0)<br>mol% | 0,012 | 0,010 | 0,010 | 0,003 | 0,003 | 0,003 |
| Cer(d18:1-18:0)<br>mol% | 0,002 | 0,002 | 0,002 | 0,000 | 0,000 | 0,000 |
| Cer(d18:1-18:1)<br>mol% | 0,000 | 0,000 | 0,000 | 0,000 | 0,000 | 0,000 |
| Cer(d18:1-19:0)<br>mol% | 0,000 | 0,000 | 0,000 | 0,000 | 0,000 | 0,000 |
| Cer(d18:1-20:0)<br>mol% | 0,002 | 0,002 | 0,002 | 0,001 | 0,001 | 0,001 |
| Cer(d18:1-22:0)<br>mol% | 0,013 | 0,013 | 0,012 | 0,016 | 0,017 | 0,018 |
| Cer(d18:1-23:0)<br>mol% | 0,005 | 0,005 | 0,005 | 0,006 | 0,006 | 0,007 |
| Cer(d18:1-24:0)<br>mol% | 0,024 | 0,023 | 0,024 | 0,019 | 0,021 | 0,021 |

|                         |       |       |       |       |       |       |
|-------------------------|-------|-------|-------|-------|-------|-------|
| Cer(d18:1-24:1)<br>mol% | 0,027 | 0,028 | 0,028 | 0,017 | 0,018 | 0,020 |
| Cer(d18:1-25:0)<br>mol% | 0,001 | 0,001 | 0,001 | 0,001 | 0,001 | 0,001 |
| Cer(d18:1-26:0)<br>mol% | 0,000 | 0,000 | 0,000 | 0,000 | 0,000 | 0,000 |
| Cer(d18:1-26:1)<br>mol% | 0,000 | 0,000 | 0,000 | 0,000 | 0,000 | 0,000 |
| Cer(d18:2-16:0)<br>mol% | 0,000 | 0,000 | 0,000 | 0,000 | 0,000 | 0,000 |
| Cer(d18:2-20:0)<br>mol% | 0,000 | 0,000 | 0,000 | 0,000 | 0,000 | 0,000 |
| Cer(d18:2-21:0)<br>mol% | 0,000 | 0,000 | 0,000 | 0,000 | 0,000 | 0,000 |
| Cer(d18:2-22:0)<br>mol% | 0,001 | 0,001 | 0,001 | 0,001 | 0,001 | 0,002 |
| Cer(d18:2-23:0)<br>mol% | 0,000 | 0,000 | 0,000 | 0,000 | 0,000 | 0,001 |
| Cer(d18:2-23:1)<br>mol% | 0,000 | 0,000 | 0,000 | 0,000 | 0,000 | 0,000 |
| Cer(d18:2-24:1)<br>mol% | 0,002 | 0,002 | 0,002 | 0,001 | 0,001 | 0,001 |
| Cer(d18:2-24:2)<br>mol% | 0,000 | 0,000 | 0,000 | 0,000 | 0,000 | 0,000 |
| SM(32:1) mol%           | 0,014 | 0,014 | 0,018 | 0,013 | 0,013 | 0,012 |



|               |       |       |       |       |       |       |
|---------------|-------|-------|-------|-------|-------|-------|
| SM(34:1) mol% | 1,827 | 1,663 | 1,823 | 0,821 | 0,837 | 0,905 |
| SM(34:2) mol% | 0,264 | 0,198 | 0,237 | 0,155 | 0,147 | 0,144 |
| SM(36:1) mol% | 0,256 | 0,221 | 0,246 | 0,100 | 0,105 | 0,117 |
| SM(36:2) mol% | 0,073 | 0,056 | 0,072 | 0,047 | 0,044 | 0,046 |
| SM(38:1) mol% | 0,131 | 0,106 | 0,113 | 0,133 | 0,126 | 0,137 |
| SM(38:2) mol% | 0,040 | 0,034 | 0,015 | 0,047 | 0,039 | 0,040 |
| SM(40:1) mol% | 0,353 | 0,301 | 0,305 | 0,801 | 0,828 | 0,874 |
| SM(40:2) mol% | 0,188 | 0,168 | 0,163 | 0,421 | 0,366 | 0,403 |
| SM(41:1) mol% | 0,081 | 0,089 | 0,079 | 0,210 | 0,198 | 0,195 |
| SM(41:2) mol% | 0,081 | 0,076 | 0,092 | 0,139 | 0,138 | 0,138 |
| SM(42:1) mol% | 0,368 | 0,322 | 0,288 | 0,544 | 0,519 | 0,440 |
| SM(42:2) mol% | 1,751 | 1,590 | 1,958 | 1,576 | 1,383 | 1,820 |
| SM(42:3) mol% | 0,735 | 0,688 | 0,720 | 0,352 | 0,329 | 0,292 |
| SM(42:4) mol% | 0,097 | 0,073 | 0,084 | 0,015 | -     | 0,009 |

PC, Phosphatidylcholine; LPC, Lysophosphatidylcholine; SM, Sphingomyelin; PI, Phosphatidylinositol; PE, Phosphatidylethanolamine; LPE, Lysophosphatidylethanolamine; PA, Phosphatidic acid; PS, Phosphatidylserine; PG, Phosphatidylglycerol; Cer, Ceramide
